# Supplementary material for: Context Dependence, Ancestral Misidentification, and Spurious Signatures of Natural Selection
Source: Oxford University Press journal article supplement (doi:10.1093/molbev/msm108), 2007-04-18
Supplement: msm108_Supplementary_Data.zip [file msm108_Supplementary_Data.zip]

# Supplemental Material for: Minding your CpG's: Context Dependence, Ancestral Misidentification, and Spurious Signatures of Natural Selection

Ryan D. Hernandez, Scott H. Williamson, Carlos D. Bustamante

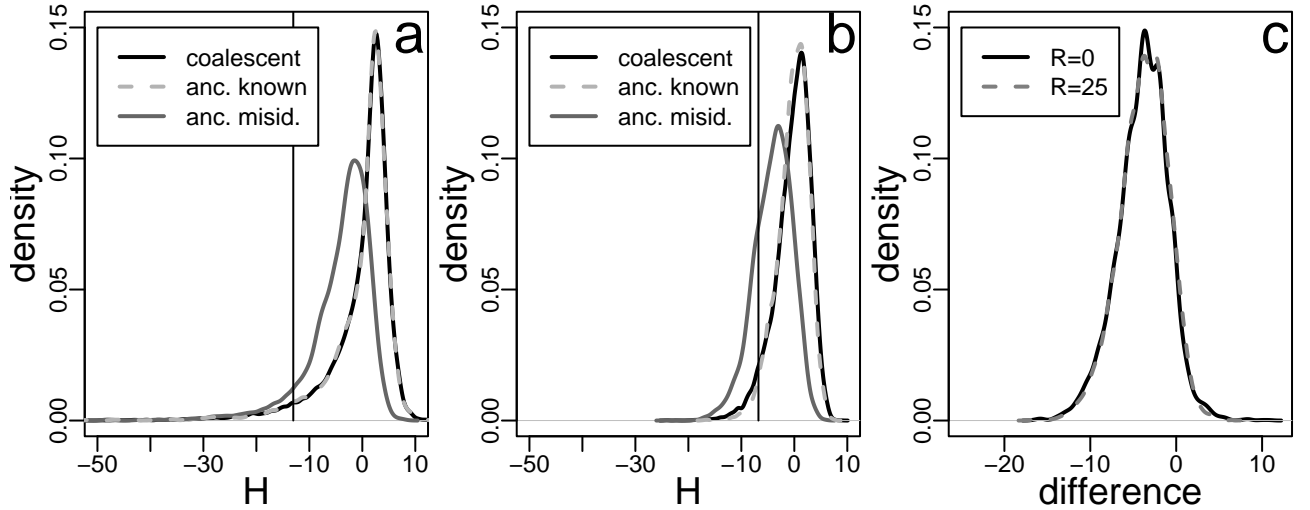

Figure S1: The distribution of the Fay and Wu (2000)  $H$  statistic for the average per sequence population scaled recombination rate  $R = 0$  (a) and  $R = 25$  (b) with the vertical lines indicating the 0.05 critical value obtained from 20,000 coalescent simulations (Hudson, 2002). (c) The distribution of the “difference” between  $H$  when the ancestral state of each polymorphism is inferred from the outgroup and  $H$  when the ancestral state is known (i.e. saved during the simulation). Each curve represents 5,000 simulations of a sequence of length 2.5kb under the context-dependent mutation model discussed in the text with an average population scaled mutation rate per locus  $\theta = 4N_e\mu = 10.75$ .

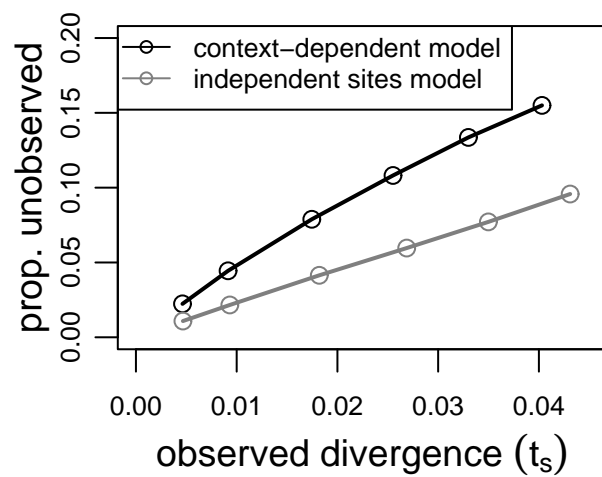

Figure S2: The proportion of substitutions that are unobserved as a function of the average number of substitutions per site ( $\tau_s$ ) for the two mutation models discussed in the text.

Table S1: Comparing the Average Number of Segregating Sites and Fixed Differences When Mutation Rates are Context-Dependent to their Expectations Under the Coalescent.

| $\tau$ | $L\theta^a$ |                    | Segregating sites |                | Substitutions    |                  |
|--------|-------------|--------------------|-------------------|----------------|------------------|------------------|
|        |             |                    | $\rho^b = 0$      | $\rho = 0.01$  | $\rho = 0$       | $\rho = 0.01$    |
| 10     | 2.15        | total <sup>c</sup> | 9.403 (4.107)     | 9.421 (3.423)  | 20.390 (5.122)   | 20.303 (4.712)   |
|        |             | obs. <sup>d</sup>  | 9.364 (4.051)     | 9.379 (3.405)  | 18.608 (4.695)   | 18.503 (4.347)   |
|        |             | exp. <sup>e</sup>  | 9.624 (4.118)     | 9.592 (3.658)  | 20.492 (5.241)   | 20.445 (4.832)   |
|        | 4.3         | total              | 18.777 (6.797)    | 18.819 (5.154) | 40.889 (8.150)   | 40.834 (6.687)   |
|        |             | obs.               | 18.714 (6.706)    | 18.756 (5.130) | 37.352 (7.464)   | 37.329 (6.259)   |
|        |             | exp.               | 19.305 (7.069)    | 19.262 (5.576) | 40.939 (8.317)   | 41.002 (6.953)   |
|        | 10.75       | total              | 46.861 (14.825)   | 46.770 (8.441) | 102.258 (16.246) | 102.251 (10.888) |
|        |             | obs.               | 46.677 (14.506)   | 46.599 (8.387) | 93.626 (14.706)  | 93.607 (10.162)  |
|        |             | exp.               | 48.117 (15.252)   | 48.174 (9.568) | 102.431 (16.682) | 102.465 (11.234) |
| 50     | 2.15        | total              | 9.354 (3.980)     | 9.409 (3.457)  | 106.379 (10.435) | 106.478 (10.455) |
|        |             | obs.               | 9.327 (3.934)     | 9.376 (3.441)  | 82.453 (8.258)   | 82.397 (8.452)   |
|        |             | exp.               | 9.648 (4.144)     | 9.627 (3.669)  | 106.382 (10.619) | 106.381 (10.494) |
|        | 4.3         | total              | 18.676 (6.752)    | 18.809 (5.137) | 212.878 (15.405) | 212.775 (14.817) |
|        |             | obs.               | 18.605 (6.638)    | 18.729 (5.108) | 165.283 (12.305) | 165.111 (11.982) |
|        |             | exp.               | 19.234 (6.948)    | 19.240 (5.533) | 213.001 (15.405) | 212.937 (14.801) |
|        | 10.75       | total              | 46.739 (14.566)   | 46.932 (8.441) | 532.733 (26.454) | 531.870 (23.826) |
|        |             | obs.               | 46.584 (14.283)   | 46.766 (8.415) | 414.415 (20.920) | 413.945 (19.071) |
|        |             | exp.               | 48.200 (15.479)   | 48.077 (9.549) | 532.175 (26.683) | 532.408 (23.422) |

Note: For all simulations,  $N_e = 250$  and  $n = 50$ . Values in parentheses are the simulated standard deviations.

<sup>a</sup>Average population scaled mutation rate per sequence ( $2N_e\mu L$ ).

<sup>b</sup>Population scaled recombination rate between adjacent sites.

<sup>c</sup>Includes observed and unobserved mutations stored during simulation.

<sup>d</sup>Includes only observed mutations.

<sup>e</sup>Determined from coalescent simulations of the neutral model (Hudson, 2002).
